# Supplementary material for: Naturally occurring antibodies isolated from PD patients inhibit synuclein seeding in vitro and recognize Lewy pathology
Source: Springer Nature journal article supplement (doi:10.1007/s00401-019-01974-5), 2019-02-25

## Supplementary Information

### Naturally-occurring antibodies isolated from PD patients inhibit synuclein seeding *in vitro* and recognize Lewy pathology

Xinyi Li<sup>1</sup>, Wouter Koudstaal<sup>2,a</sup>, Lauren Fletcher<sup>1</sup>, Martha Costa<sup>1</sup>, Margot van Winsen<sup>2</sup>, Berdien Siregar<sup>2</sup>, Hanna Inganäs<sup>2</sup>, Julie Kim<sup>1</sup>, Elissa Keogh<sup>1</sup>, Jeremy Macedo<sup>1</sup>, Trevin Holland<sup>1</sup>, Stuart Perry<sup>1</sup>, Frederique Bard<sup>1</sup>, Jeroen J. Hoozemans<sup>3</sup>, Jaap Goudsmit<sup>2,4,5</sup>, Adrian Apetri<sup>2,b</sup>, Gabriel Pascual<sup>1,b</sup>

<sup>1</sup>Janssen Prevention Center, Janssen Pharmaceutical Companies of Johnson & Johnson, 3210 Merryfield Row, San Diego, CA 92121, USA. <sup>2</sup>Janssen Prevention Center, Janssen Pharmaceutical Companies of Johnson & Johnson, Archimedesweg 6, 2333 CN, Leiden, the Netherlands; <sup>3</sup>Department of Pathology, Amsterdam Neuroscience, VU University Medical Center, De Boelelaan 1117, 1081 HV, Amsterdam, the Netherlands; <sup>4</sup>Department of Epidemiology, Harvard T.H. Chan School of Public Health, 677 Huntington Avenue, Boston, MA 02115, USA; <sup>5</sup>Department of Neurology, Amsterdam Neuroscience, Academic Medical Center, Meidreefberg 9, 1105 AZ Amsterdam, the Netherlands.

<sup>a</sup>Present address: Lucidity Biomedical Consulting, Calle Emir 11, 18006, Granada, Spain

<sup>b</sup>To whom correspondence should be addressed: GPascual@its.jnj.com; APetri@its.jnj.com

**Table S1: Peptides and protein used in the study**

|      | Peptide                  | Residues    | Amino Acid sequence                                                           |
|------|--------------------------|-------------|-------------------------------------------------------------------------------|
|      | syn1-25                  | Syn 1-25    | MDVFMKGLSKAKEGVVAAAETKQG                                                      |
|      | syn18-44                 | Syn 18-44   | AAEKTQGVAAEAGKTKEGVLYVGSKT                                                    |
|      | syn40-65                 | Syn 40-65   | VGSKTKEGVVHGVATVAEKTKEQVTN                                                    |
|      | s17                      | Syn101-120  | GKNEEGAPQEGILEDMPVDP                                                          |
|      | s18                      | Syn111-130  | GILEDMPVDPDNEAYEMPSE                                                          |
|      | s19                      | Syn121-140  | DNEAYEMPSEEGYQDYEPEA                                                          |
| Bait | pS129-(111-140)-LCBiot   | Syn 111-140 | GILEDMPVDPDNEAYEMP(pS)EEGYQDYEPEA-LCBiot                                      |
| Bait | LCBiot-pS87-(73-93)      | Syn 73-93   | LCBiot-GVTAVAQKTVEGAG(pS)IAAATG                                               |
| Bait | 61-95-LCBiot             | Syn 61-95   | EQVTNVGGAVVTGVTAVAQKTVEGAGSIAAATGFV-K-LCBiot                                  |
| Bait | LCBiot-61-95             | Syn 61-95   | LCBiot-EQVTNVGGAVVTGVTAVAQKTVEGAGSIAAATGFVK                                   |
| Bait | $\alpha$ -Synuclein-Biot | Syn 1-140   | Full Length-Biot                                                              |
| Bait | LCBiot-79-110            | Syn 79-110  | LCBiot- QKTVEGAGSIAAATGFVKKDQLGKNEEGAPQE                                      |
| Bait | LCBiot-100-120           | Syn 100-120 | LCBiot-LGKNEEGAPQEGILEDMPVDP                                                  |
| Bait | 121-140-LCBiot           | Syn 121-140 | DNEAYEMPSEEGYQDYEPEA-LCBiot                                                   |
|      | NP129-(111-140)-LCBiot   | Syn 111-140 | GILEDMPVDPDNEAYEMPSEEGYQDYEPEA-LCBiot                                         |
|      | LCBiot-NP87-(73-93)      | Syn 73-93   | LCBiot-GVTAVAQKTVEGAGSIAAATG                                                  |
|      | A6940                    | Tau 42-103  | GLKESPLQPTPTEDGSEEPGSETSDAKSTPTAEDVTAPLVDEGAPGKQAA<br>AQPHTIPEGTTA            |
|      | A7416                    | Tau 166-211 | ANATRIPAKTPPAPKTPPSSGEPKSGDRSGYSSPGSPGTPGSRSR                                 |
|      | NPAT8                    | Tau 194-212 | RSGYSSPGSPGTPGSRRT                                                            |
|      | A6907                    | Tau 186-253 | GEPKSGDRSGYSSPGSPGTPGSRRTPLPTPTREPKKVAVVRTPPKSP<br>SSAKSRLQTAPVMPDL           |
|      | A6897                    | Tau 299-369 | HVPGGGSVQIVYKPVDSLKVTSKCGSLGNIHHKPGGGQVEVKSEKLDLDF<br>KDRVQSKIGSLDNITHVPGGGNK |
|      | A7024                    | Tau 139-198 | DKKAKGADGKTKIATPRGAAPPQKGQANATRIPAKTPPAPKTPPSSGE<br>PPKSGDRSGYS               |

SA, Streptavidin conjugated -APC or -PE

Bait are peptides used in BSelex screening.

Numbering for Tau peptides corresponds to the 2N4R tau isoform.

**Fig. S1** Recombinant full length  $\alpha$ -Synuclein-Biot purification and quality analysis. **a** SDS-PAGE under non-reducing conditions of different fractions from preparative SEC. **b** Analytical SEC of final batch. **c** SEC-MALS binding experiment of biotinylated  $\alpha$ -synuclein with streptavidin-PE. The highly pure fractions D4, 5, 6, 7, 8, 9 and 10 were pooled together as the final batch.

**Fig. S2** Affinity of aSyn-323.1, aSyn-336.1 and aSyn-338.1 to synuclein peptides. Isothermal Titration Calorimetry (ITC) measurements for aSyn-323.1 with peptide syn19 (Syn121-140) **a**, aSyn-336.1 with peptide syn18 (Syn111-130) **b**, and aSyn-338.1 with peptide syn19 (Syn121-140)**c**. Variation in enthalpy is observed following incremental addition of mAb stock to synuclein peptide. No binding of antibodies to negative control peptide syn17 (Syn101-120) was observed. Continuous lines represent the best fit of experimental data assuming a single set of binding sites. Experiments were performed in PBS. Equilibrium dissociation constants ( $K_d$ ) are shown on the individual graphs. The amino acid sequences of synuclein peptides are shown in Table S1.

Fig. S1

**a**

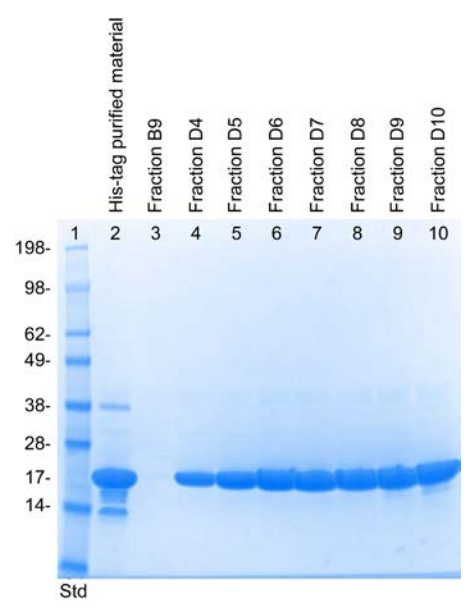

**b**

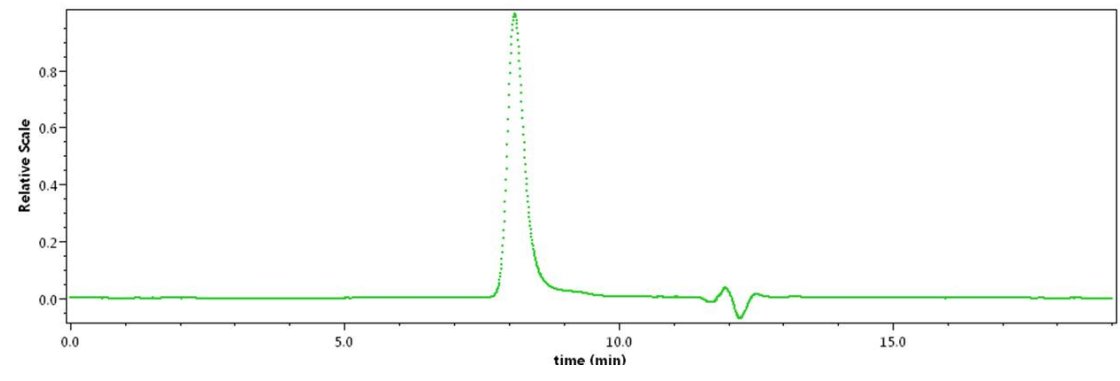

**c**

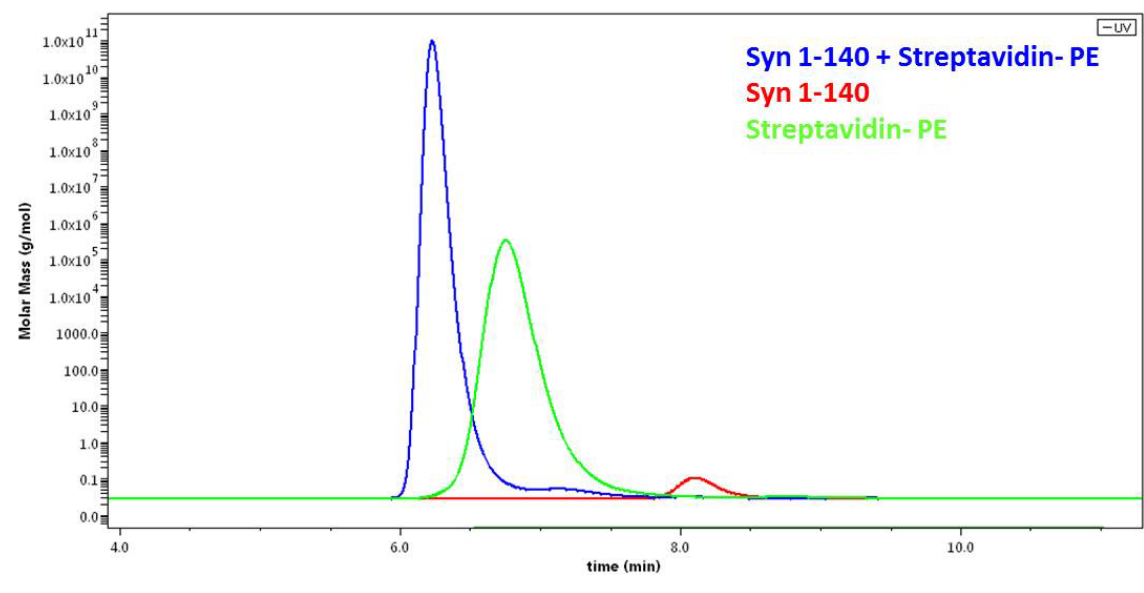

Fig. S2

**a**

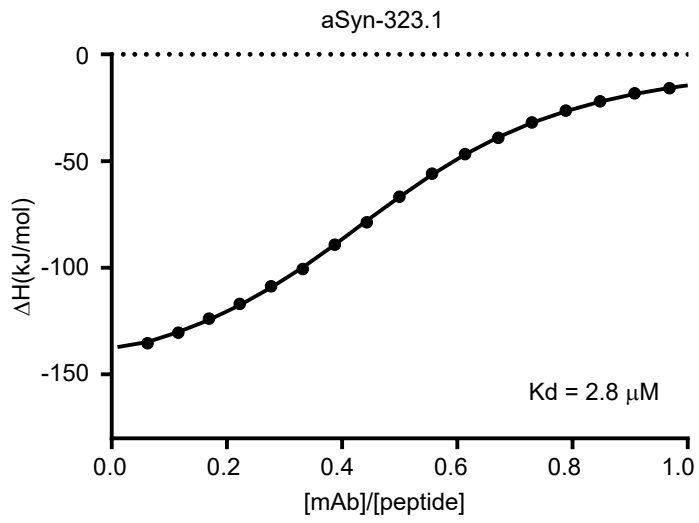

**b**

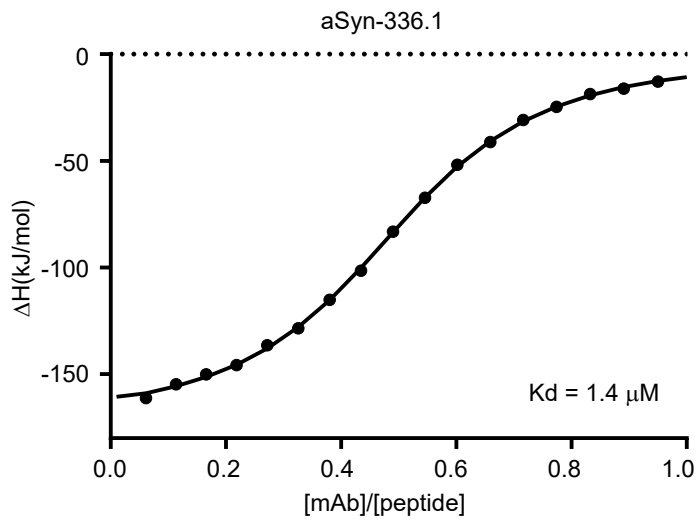

**c**

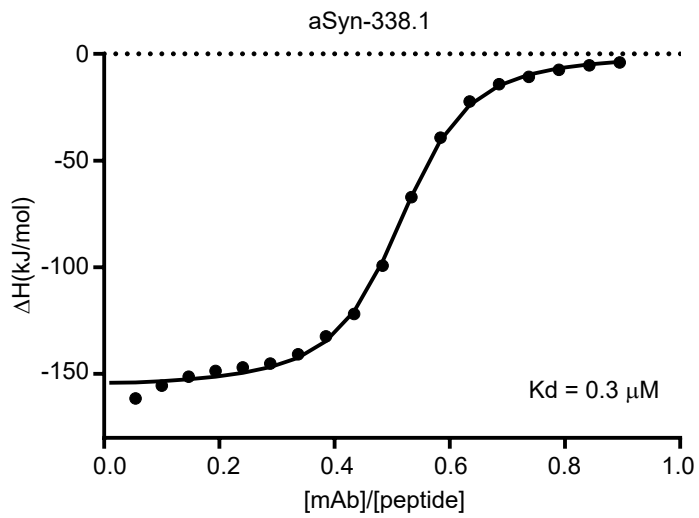

Supplement: MOESM1 [file 16506084]
